# Supplementary material for: Automated Capture of Intraoperative Adverse Events Using Artificial Intelligence: A Systematic Review and Meta-Analysis
Source: MDPI journal article supplement (doi:10.3390/jcm12041687), 2023-02-20
Supplement: s1 [file s1]

## Forest plot of sensitivity

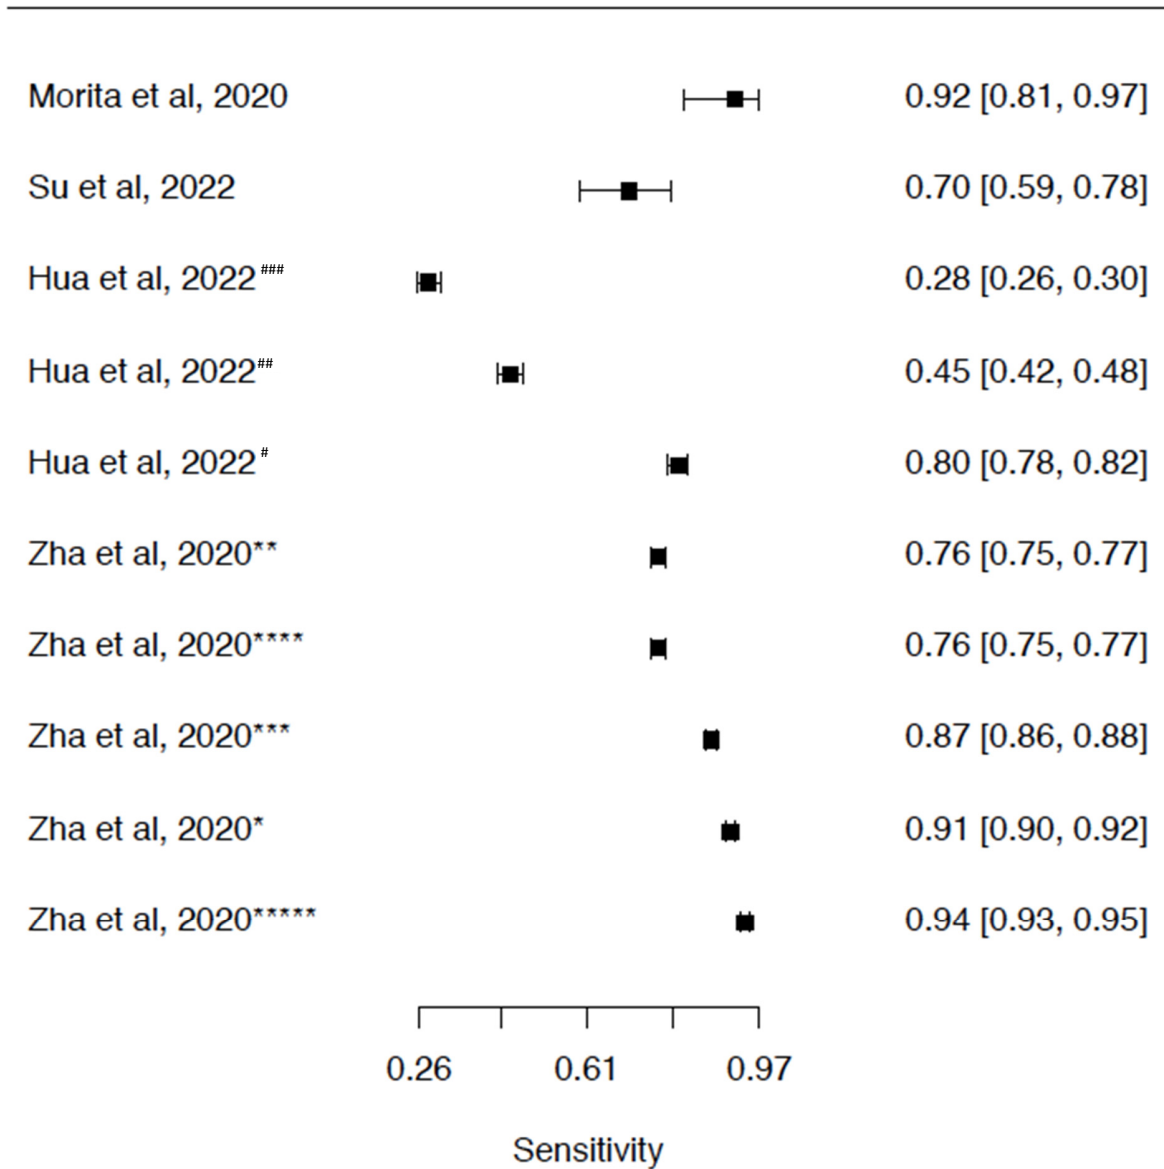

Figure S1. Forest plot of sensitivity. # Hua RGB + optical flow; ## Hua RGB; ### Hua optical flow; \* Zha CNN-LSTM single patient; \*\*Zha GNB single patient; \*\*\*Zha CNN single patient; \*\*\*\*Zha RNN single patient; \*\*\*\*\*Zha CNN-LSTM cross patient [18,20,22,25].

## Forest plot of specificity

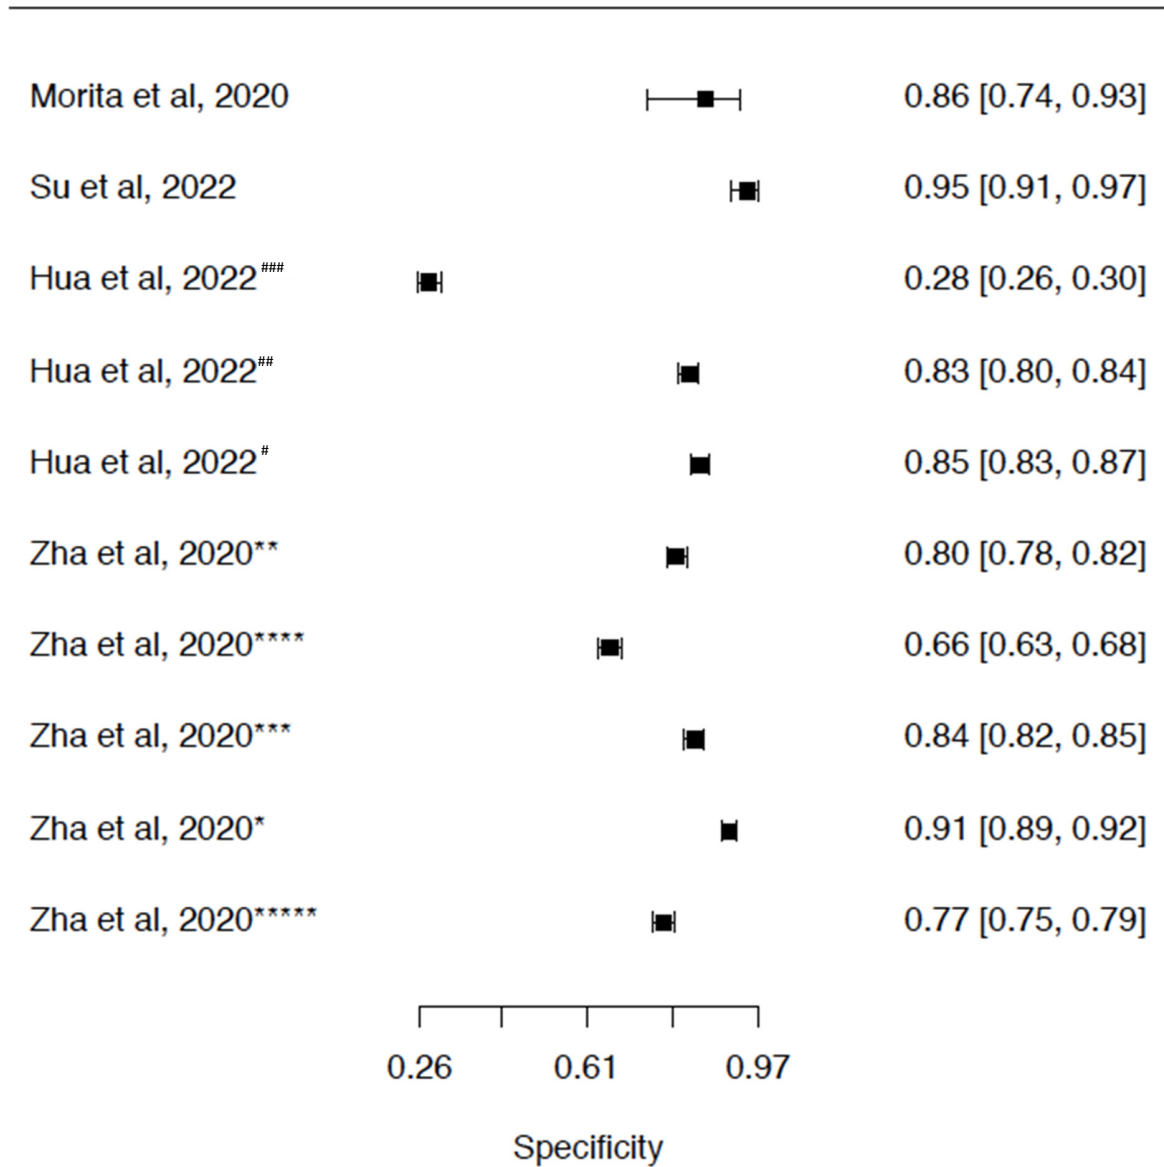

Figure S2. Forest plot of specificity. # Hua RGB + optical flow; ## Hua RGB; ### Hua optical flow; \* Zha CNN-LSTM single patient; \*\*Zha GNB single patient; \*\*\*Zha CNN single patient; \*\*\*\*Zha RNN single patient; \*\*\*\*\*Zha CNN-LSTM cross patient [18,20,22,25].
