# Supplementary material for: Automated Capture of Intraoperative Adverse Events Using Artificial Intelligence: A Systematic Review and Meta-Analysis
Source: MDPI journal article supplement (doi:10.3390/jcm12041687), 2023-02-20
Supplement: s1 [file s1]

| Study           | Algorithm or statistic model                    | Description                            | Sensitivity (recall) | Specificity | Accuracy  | PPV (precision) | NPV | AUC-ROC | IoU  | Dice Coefficient | Correlation coefficient | RMSE | Time consumption |
|-----------------|-------------------------------------------------|----------------------------------------|----------------------|-------------|-----------|-----------------|-----|---------|------|------------------|-------------------------|------|------------------|
| Chen            | KNN                                             | Validation                             |                      |             | 0.55      |                 |     |         |      |                  |                         |      |                  |
|                 | Naïve Bayes                                     | Validation                             |                      |             | 0.64      |                 |     |         |      |                  |                         |      |                  |
|                 | Random Forest                                   | Validation                             |                      |             | 0.73      |                 |     |         |      |                  |                         |      |                  |
|                 | SVM                                             | Validation                             |                      |             | 0.64      |                 |     |         |      |                  |                         |      |                  |
|                 | KNN                                             | Testing (revised)                      | 0.89                 |             | 0.9       | 0.85            |     |         |      |                  |                         |      |                  |
|                 | Naïve Bayes                                     | Testing (revised)                      | 0.9                  |             | 0.89      | 0.85            |     |         |      |                  |                         |      |                  |
|                 | Random Forest                                   | Testing (revised)                      | 0.92                 |             | 0.9       | 0.86            |     |         |      |                  |                         |      |                  |
|                 | SVM                                             | Testing (revised)                      | 0.91                 |             | 0.91      | 0.87            |     |         |      |                  |                         |      |                  |
|                 | ResUNet (segmentation)                          |                                        |                      |             |           |                 |     |         | 0.51 | 0.69             |                         |      |                  |
|                 | KNN (w/ segmentation)                           | Correlation (testing and ground-truth) |                      |             |           |                 |     |         |      |                  | 0.59                    |      |                  |
|                 | Naïve Bayes (w/ segmentation)                   | Correlation (testing and ground-truth) |                      |             |           |                 |     |         |      |                  | 0.62                    |      |                  |
|                 | Random Forest (w/ segmentation)                 | Correlation (testing and ground-truth) |                      |             |           |                 |     |         |      |                  | 0.62                    |      |                  |
|                 | SVM (w/ segmentation)                           | Correlation (testing and ground-truth) |                      |             |           |                 |     |         |      |                  | 0.6                     |      |                  |
|                 | KNN (w/out segmentation)                        | Correlation (testing and ground-truth) |                      |             |           |                 |     |         |      |                  | 0.58                    |      |                  |
|                 | Naïve Bayes (w/out segmentation)                | Correlation (testing and ground-truth) |                      |             |           |                 |     |         |      |                  | 0.6                     |      |                  |
| Morita          | Random Forest (w/out segmentation)              | Correlation (testing and ground-truth) |                      |             |           |                 |     |         |      |                  | 0.62                    |      |                  |
|                 | SVM (w/out segmentation)                        | Correlation (testing and ground-truth) |                      |             |           |                 |     |         |      |                  | 0.6                     |      |                  |
|                 | Inception V3 (CNN)                              | This study                             | 0.91                 | 0.86        | 0.9       |                 |     | 0.97    |      |                  |                         |      |                  |
|                 | Self-organizing map (artificial neural network) | This study                             | 1                    |             | 0.87      | 0.6             |     | 0.84    |      |                  |                         |      |                  |
| Park            | TR                                              | Conventional parameter                 | 0.67                 |             | 0.87      | 0.67            |     | 0.73    |      |                  |                         |      |                  |
|                 | T1/2max                                         | Conventional parameter                 | 0.67                 |             | 0.67      | 0.33            |     | 0.75    |      |                  |                         |      |                  |
|                 | RS                                              | Conventional parameter                 | 1                    |             | 0.8       | 0.5             |     | 0.68    |      |                  |                         |      |                  |
|                 | Spatial-temporal networks (CNN, RNN)            | 10-fold cross validation               | 0.7                  |             |           | 0.83            |     | 0.93    |      |                  |                         |      |                  |
| Zhang           | SI-CNN                                          | This study                             |                      |             |           |                 |     | 0.87    |      |                  |                         |      |                  |
|                 | SIm-CNN                                         | This study                             |                      |             |           |                 |     | 0.89    |      |                  |                         |      |                  |
|                 | B-mode                                          | Other metric                           |                      |             |           |                 |     | 0.69    |      |                  |                         |      |                  |
| Zha             | CNN-LSTM single patient                         | This study                             | 0.91                 |             | 0.91      |                 |     |         |      |                  |                         |      |                  |
|                 | GNB single patient                              | Other metric                           | 0.76                 |             | 0.75      |                 |     |         |      |                  |                         |      |                  |
|                 | CNN single patient                              | Other metric                           | 0.87                 |             | 0.86      |                 |     |         |      |                  |                         |      |                  |
|                 | RNN single patient                              | Other metric                           | 0.76                 |             | 0.73      |                 |     |         |      |                  |                         |      |                  |
|                 | CNN-LSTM cross patient                          | Training                               | 0.99                 |             | 0.997     |                 |     |         |      |                  |                         |      |                  |
|                 | CNN-LSTM cross patient                          | Testing                                | 0.94                 |             | 0.89      |                 |     |         |      |                  |                         |      |                  |
| Garcia-Martinez | Computer vision algorithm, in vitro             | This study                             | 0.87                 | 0.96        | 0.95      |                 |     |         |      |                  |                         |      |                  |
|                 | Computer vision algorithm, in vivo              | This study                             | 0.72                 | 0.93        | 0.88      |                 |     |         |      |                  |                         |      |                  |
|                 | Tonmoy Ghosh, in vitro                          | Other metric                           | 0.96                 | 0.92        | 0.92      |                 |     |         |      |                  |                         |      |                  |
|                 | Tonmoy Ghosh, in vivo                           | Other metric                           | 0.91                 | 0.49        | 0.6       |                 |     |         |      |                  |                         |      |                  |
|                 | Yixuan Yuan, in vitro                           | Other metric                           | 0.996                | 0.83        | 0.84      |                 |     |         |      |                  |                         |      |                  |
|                 | Yixuan Yuan, in vivo                            | Other metric                           | 0.93                 | 0.5         | 0.61      |                 |     |         |      |                  |                         |      |                  |
| Wei             | Thermal injury detection                        | This study                             |                      |             |           | 0.63            |     | 0.95    |      |                  |                         |      |                  |
|                 | Bleeding detection                              | This study                             |                      |             |           | 0.34            |     | 0.82    |      |                  |                         |      |                  |
| Hua             | RGB + optical flow                              |                                        | 0.8                  |             |           | 0.84            |     |         | 0.7  |                  |                         |      |                  |
|                 | RGB                                             |                                        | 0.45                 |             |           | 0.72            |     |         |      |                  |                         |      |                  |
|                 | Optical flow                                    |                                        | 0.28                 |             |           | 0.28            |     |         |      |                  |                         |      |                  |
|                 | Same model laparoscope                          |                                        | 0.95-0.99            | 0.91-0.995  | 0.91-0.99 |                 |     |         |      |                  |                         |      |                  |
| Okamoto         | Different model laparoscope                     |                                        | 0.93-1               | 0.86-1      | 0.86-1    |                 |     |         |      |                  |                         |      |                  |
|                 | Hemorrhage detection                            |                                        | .45-1                | 0.33-1      |           |                 |     |         |      |                  |                         |      | 0.1-0.6 sec      |
| Jo              | Deep learning network                           | This study                             |                      | 0.85        |           |                 |     |         |      |                  |                         | 358  |                  |
|                 | Control                                         | Control                                |                      |             |           |                 |     |         |      |                  |                         | 489  |                  |
|                 | Control                                         | Control                                |                      |             |           |                 |     |         |      |                  |                         | 431  |                  |
| Pangal          | SOCALNet                                        |                                        | 1                    | 0.66        | 0.85      | 0.79            | 1   |         |      |                  |                         |      |                  |

PPV positive predictive value, NPV negative predictive value, AUC-ROC aread under curve-receiver operator characteristics, RMSE root mean squre error
