# Supplementary material for: Automated Capture of Intraoperative Adverse Events Using Artificial Intelligence: A Systematic Review and Meta-Analysis
Source: MDPI journal article supplement (doi:10.3390/jcm12041687), 2023-02-20
Supplement: s1 [file s1]

| Search Terms by Database |                                                                                                                                                                                                                                                                                                                                                                                                                                                                                                                                                                                                                                                                                            |
|--------------------------|--------------------------------------------------------------------------------------------------------------------------------------------------------------------------------------------------------------------------------------------------------------------------------------------------------------------------------------------------------------------------------------------------------------------------------------------------------------------------------------------------------------------------------------------------------------------------------------------------------------------------------------------------------------------------------------------|
| Database                 | Search                                                                                                                                                                                                                                                                                                                                                                                                                                                                                                                                                                                                                                                                                     |
| <b>PubMed</b>            | (predict* OR identif* OR recog*) AND (((("Artificial Intelligence"[Mesh] OR "Big Data"[Mesh] OR "data science*" [tiab] OR "data analytic*" [tiab] OR "data-driven science*" [tiab] OR "artificial intelligence" [tiab] OR "machine learning" [tiab] OR "big data" [tiab] OR "computational intelligence" [tiab] OR "deep learning" [tiab] OR "computer calculated" [tiab]) AND ("Surgical Procedures, Operative" [Mesh] OR "surgery" [Subheading] OR "General Surgery" [Mesh] OR "surger*" [tiab] OR "surgical*" [tiab] OR "perioperat*" [tiab] OR "perioperati*" [tiab])) AND (((((adverse event) OR (complication)) OR (patient safety incident)) OR (incident))) AND (2013:2022[pdat])) |
| <b>Scopus</b>            | TITLE-ABS-<br>KEY ( ( ( predict* OR identif* OR recog* ) AND ( ( ( "Artificial Intelligence" OR "Big Data" OR "data science*" OR "data analytic*" OR "data-driven science*" OR "artificial intelligence" OR "machine learning" OR "big data" OR "computational intelligence" OR "deep learning" OR "computer calculated" ) AND ( "Surgical Procedures, Operative" OR "surgery" OR "General Surgery" OR "surger*" [ OR "surgical*" OR "perioperat*" OR "perioperati*" ) ) AND ( ( ( ( ( adverse AND event ) OR ( complication ) ) OR ( patient AND safety AND incident ) ) OR ( incident ) ) ) ) ) ) )                                                                                      |
| <b>Web of Science</b>    | AB=((predict* OR identif* OR recog* ) AND ("Artificial Intelligence" OR "Big Data" OR "data science*" OR "data analytic*" OR "data-driven science*" OR "artificial intelligence" OR "machine learning" OR "big data" OR "computational intelligence" OR "deep learning" OR "computer calculated") AND ("Surgical Procedures, Operative" OR "surgery" OR "General Surgery" OR "surger*" OR "surgical*" OR "perioperat*" OR "perioperati*") AND ("adverse event" OR complication OR "patient safety incident" OR incident))                                                                                                                                                                  |
| <b>IEEE Xplore</b>       | ((((Artificial Intelligence OR Big Data OR data science OR data analytic OR data-driven science OR artificial intelligence OR machine learning OR big data OR computational intelligence OR deep learning OR computer calculated) AND (Surgical Procedures OR surgery OR General Surgery OR surger_ OR surgical_ OR perioperat_ OR perioperati_ ) AND (adverse event OR complication OR patient safety incident OR incident)))                                                                                                                                                                                                                                                             |
