# Supplementary material for: Automated Capture of Intraoperative Adverse Events Using Artificial Intelligence: A Systematic Review and Meta-Analysis
Source: MDPI journal article supplement (doi:10.3390/jcm12041687), 2023-02-20

Figure S3: Flowcharts of Methodologies for Automatically Detecting Intraoperative Adverse Events [17–29].

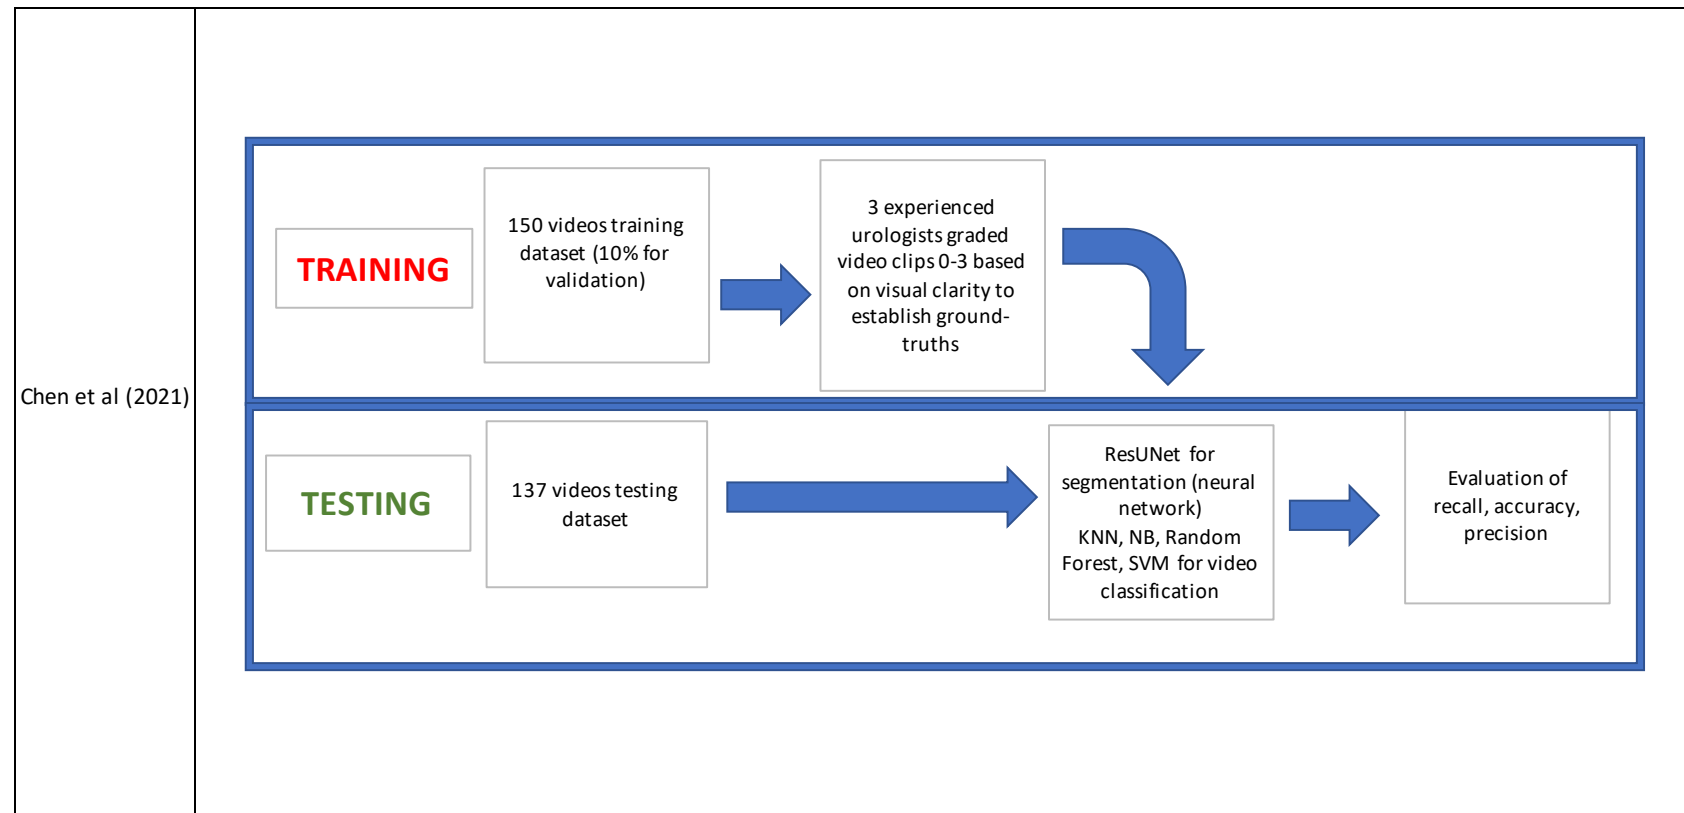

Morita et al  
(2020)

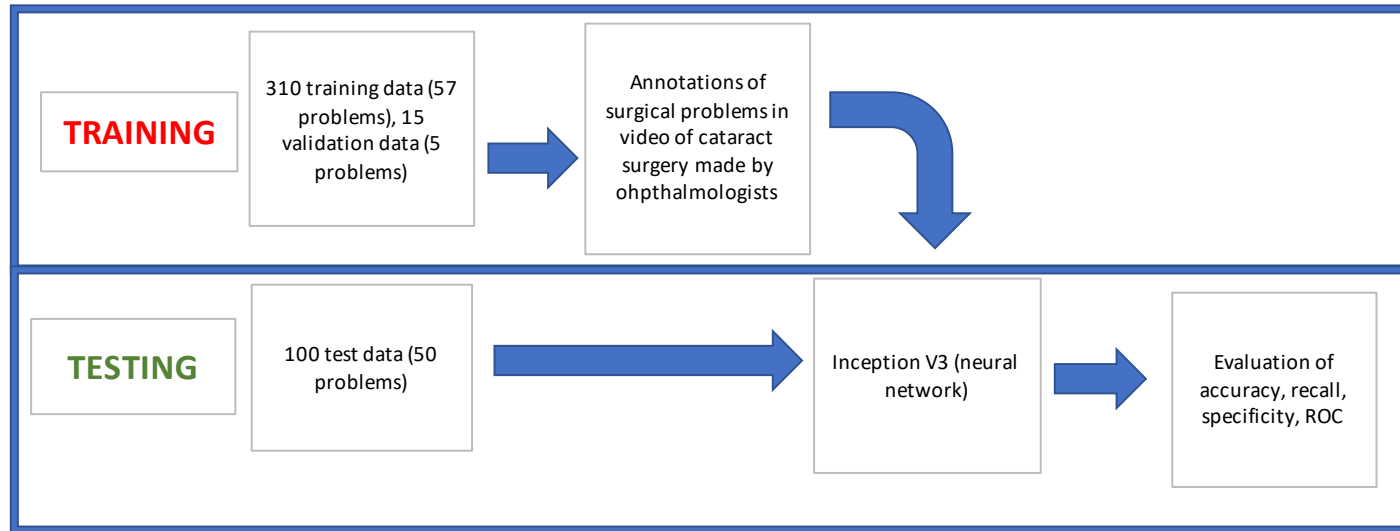

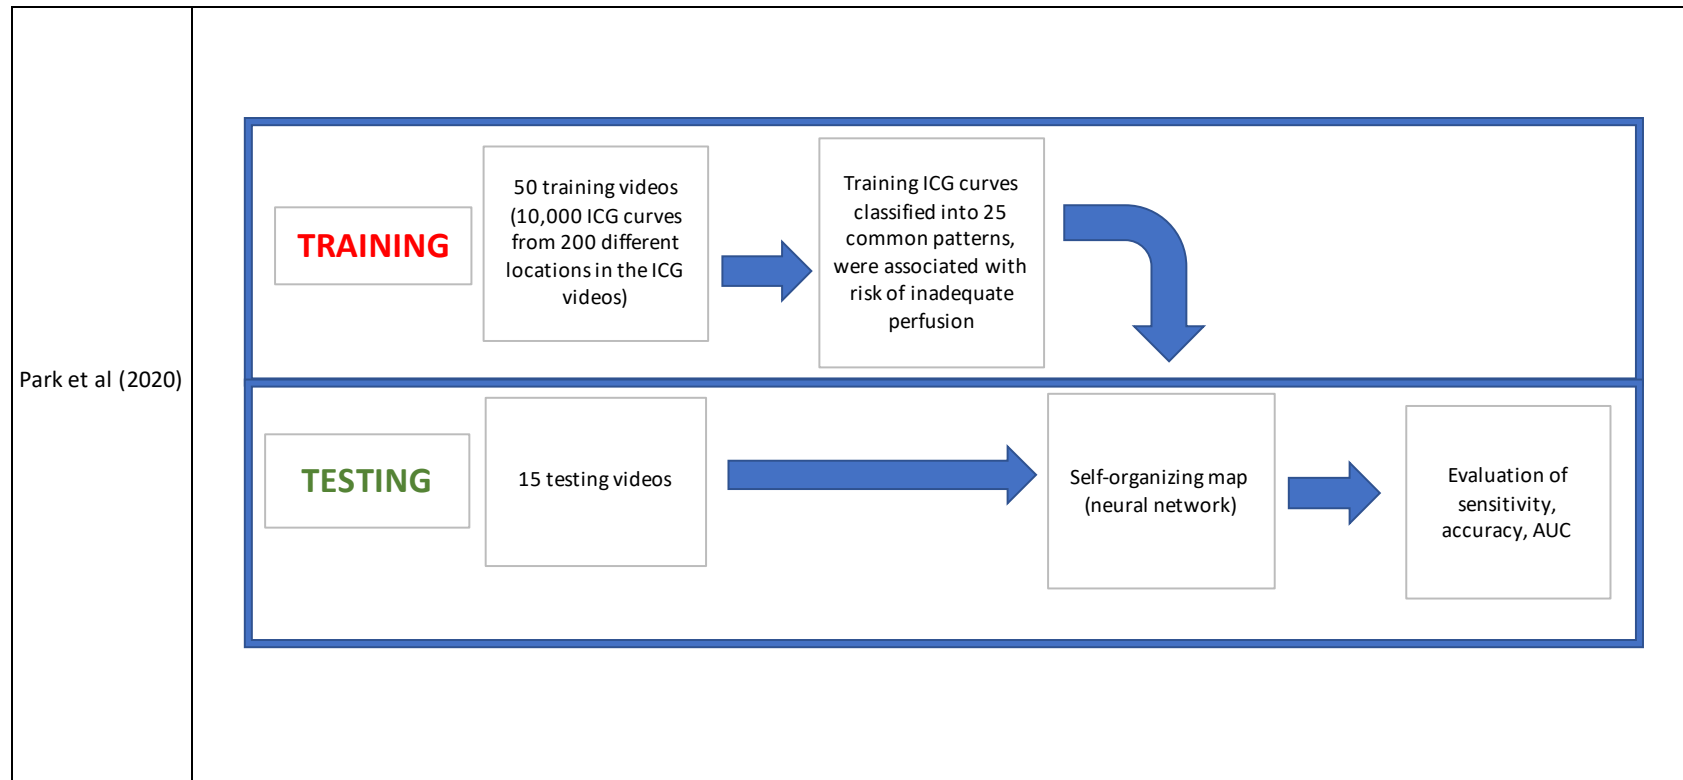

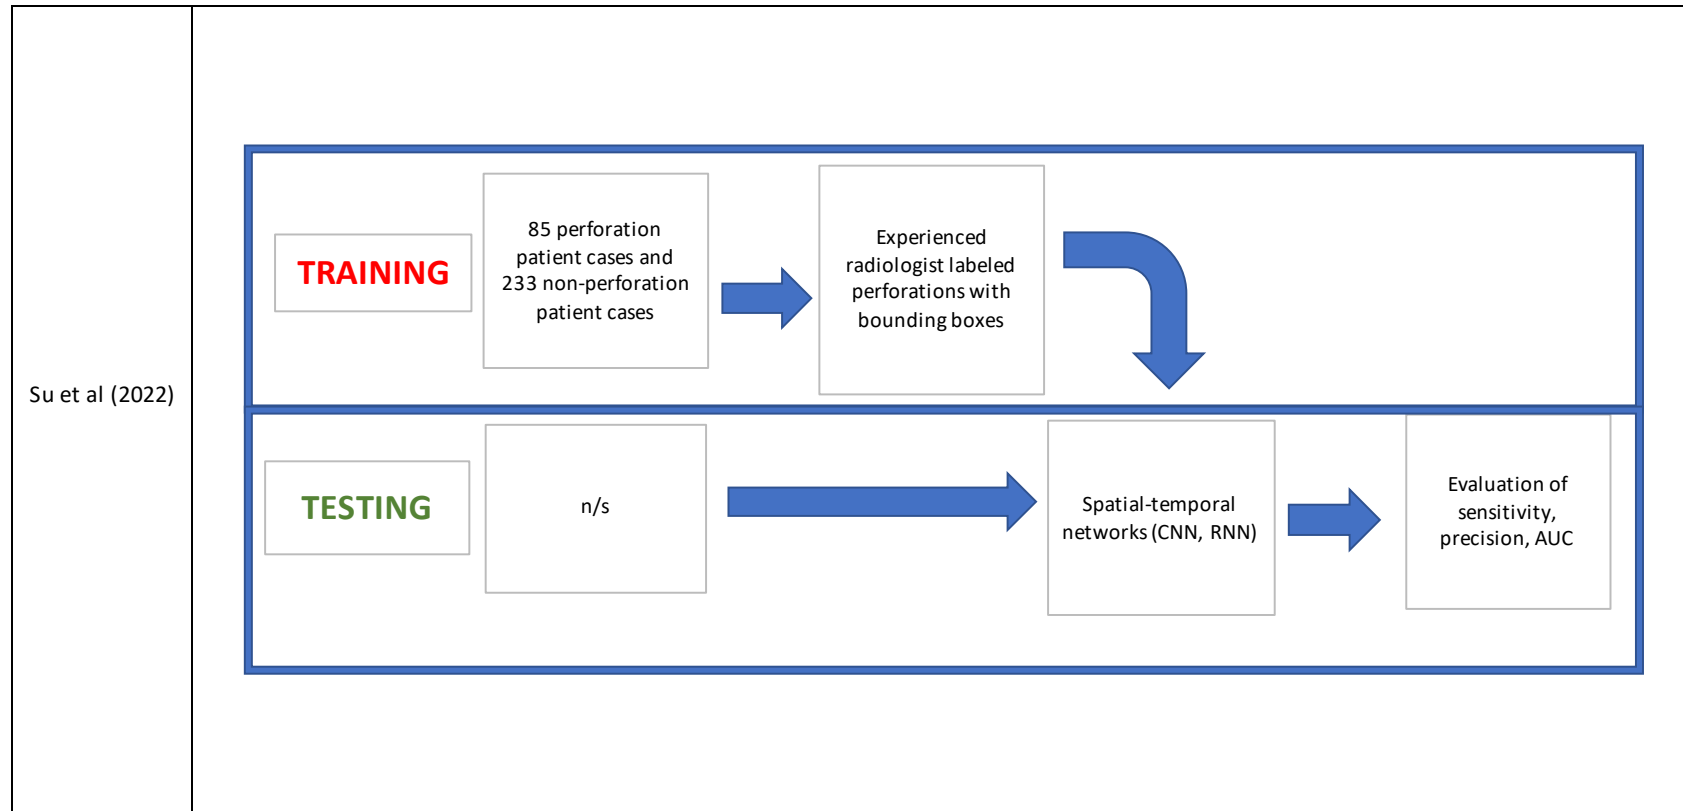

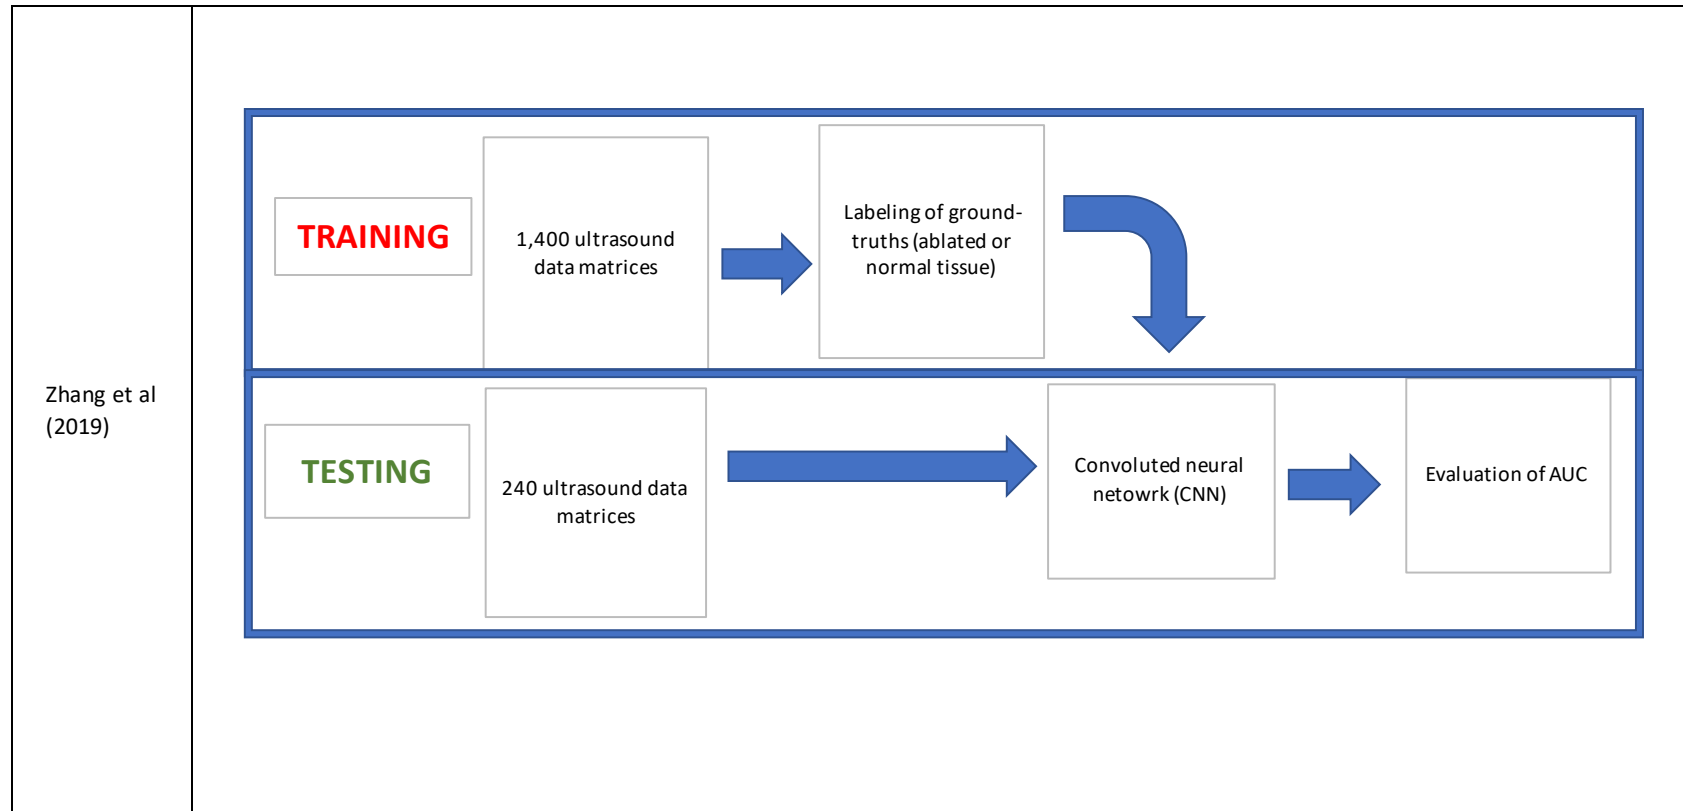

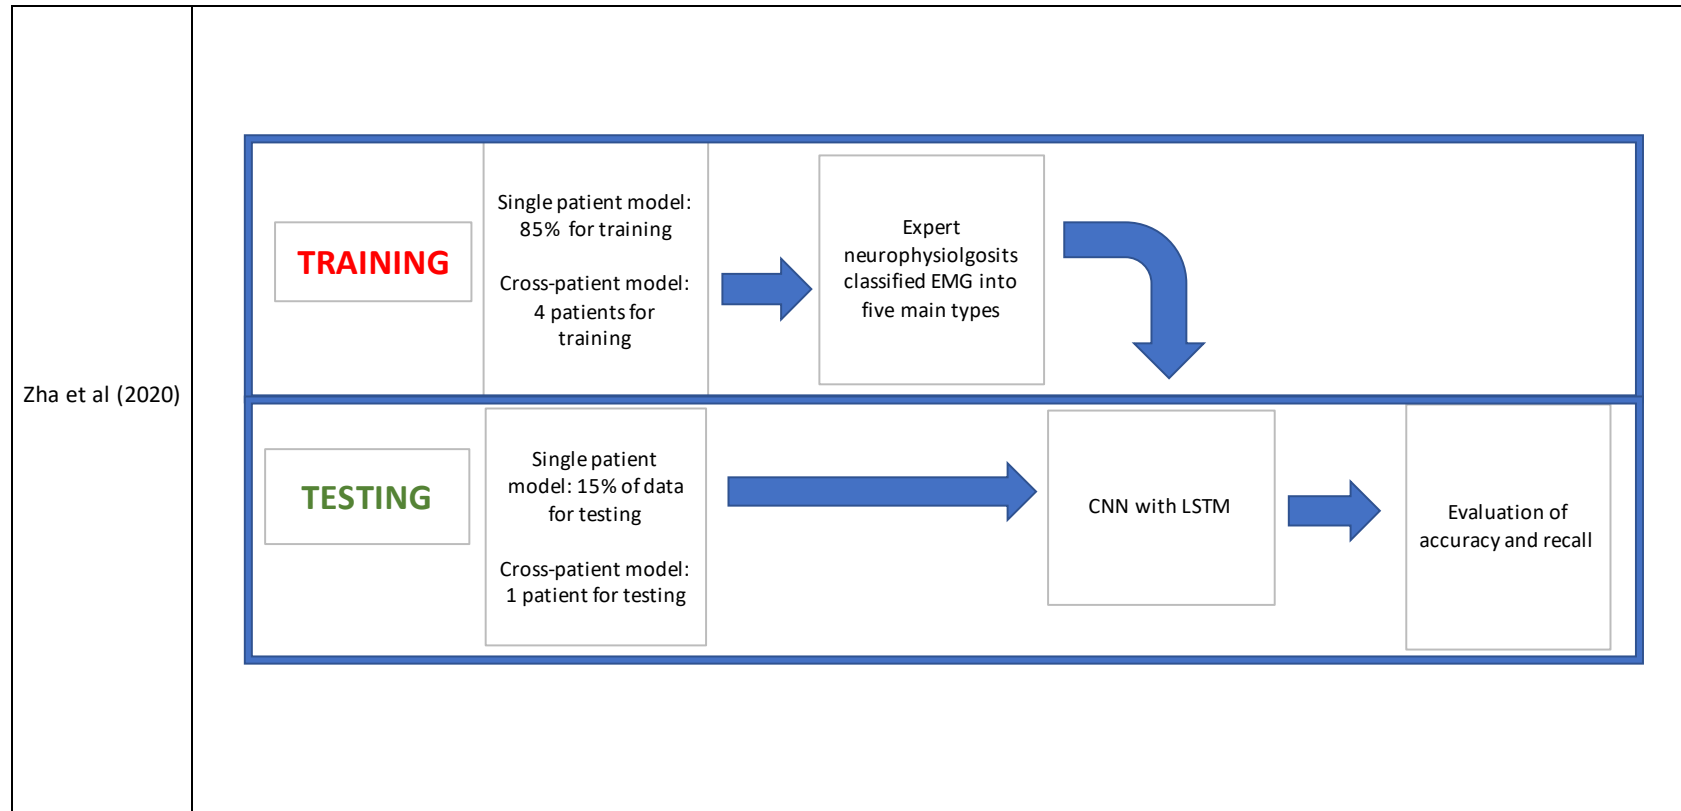

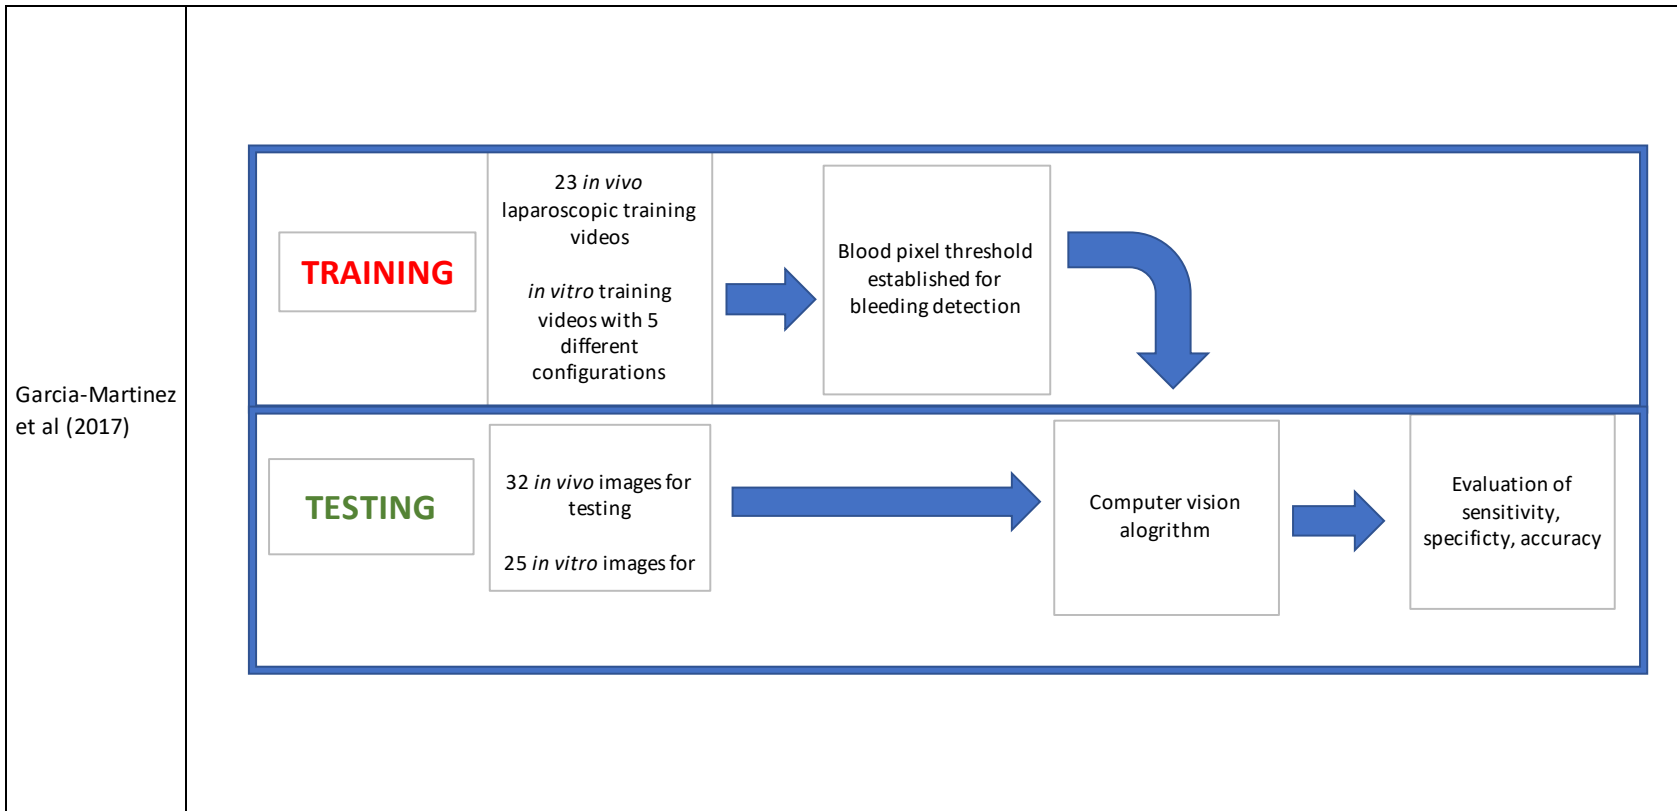

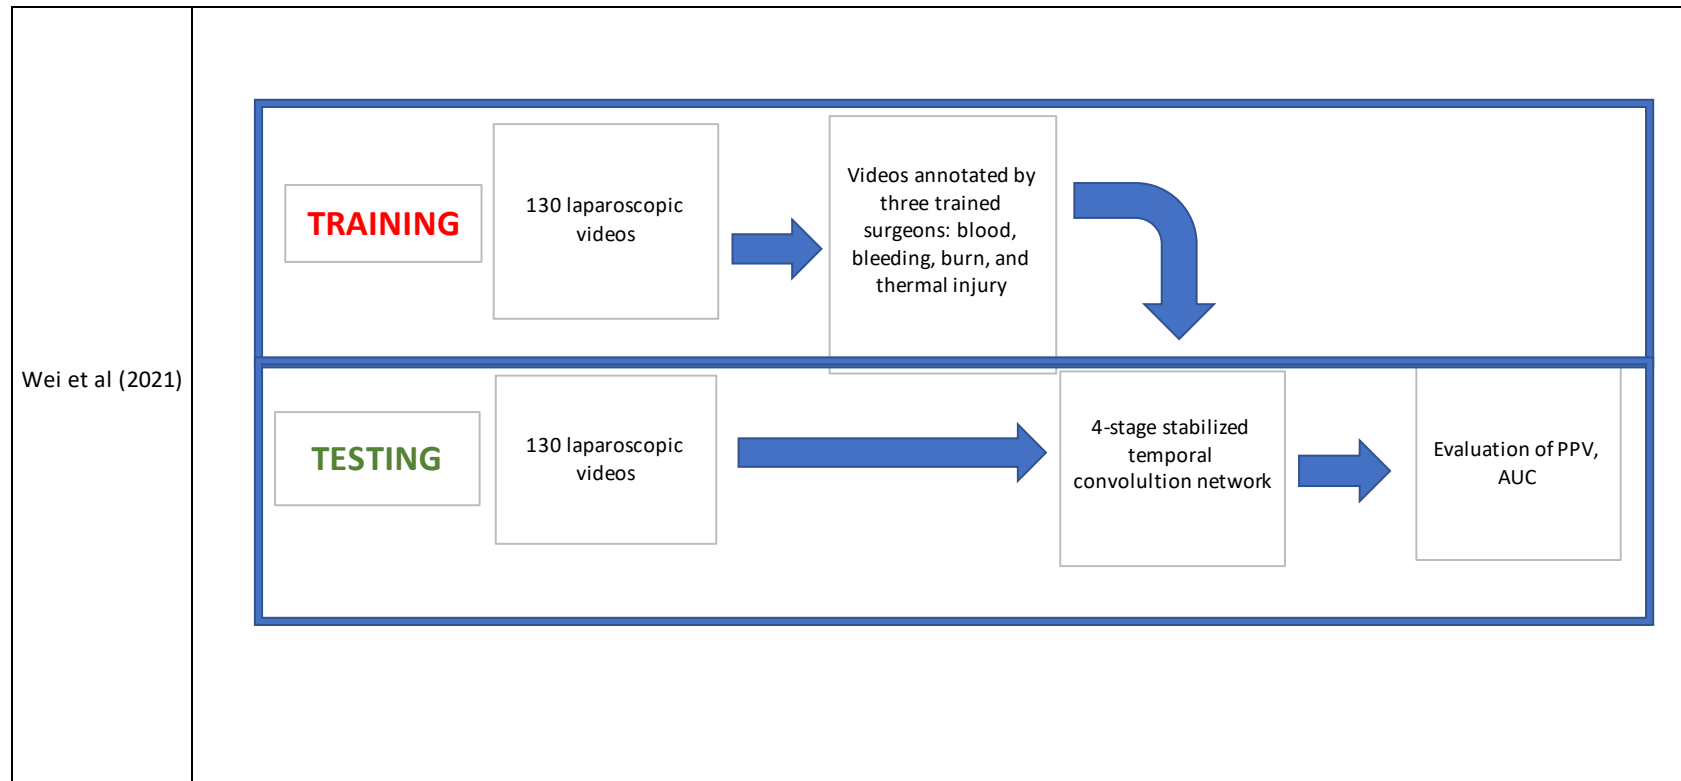



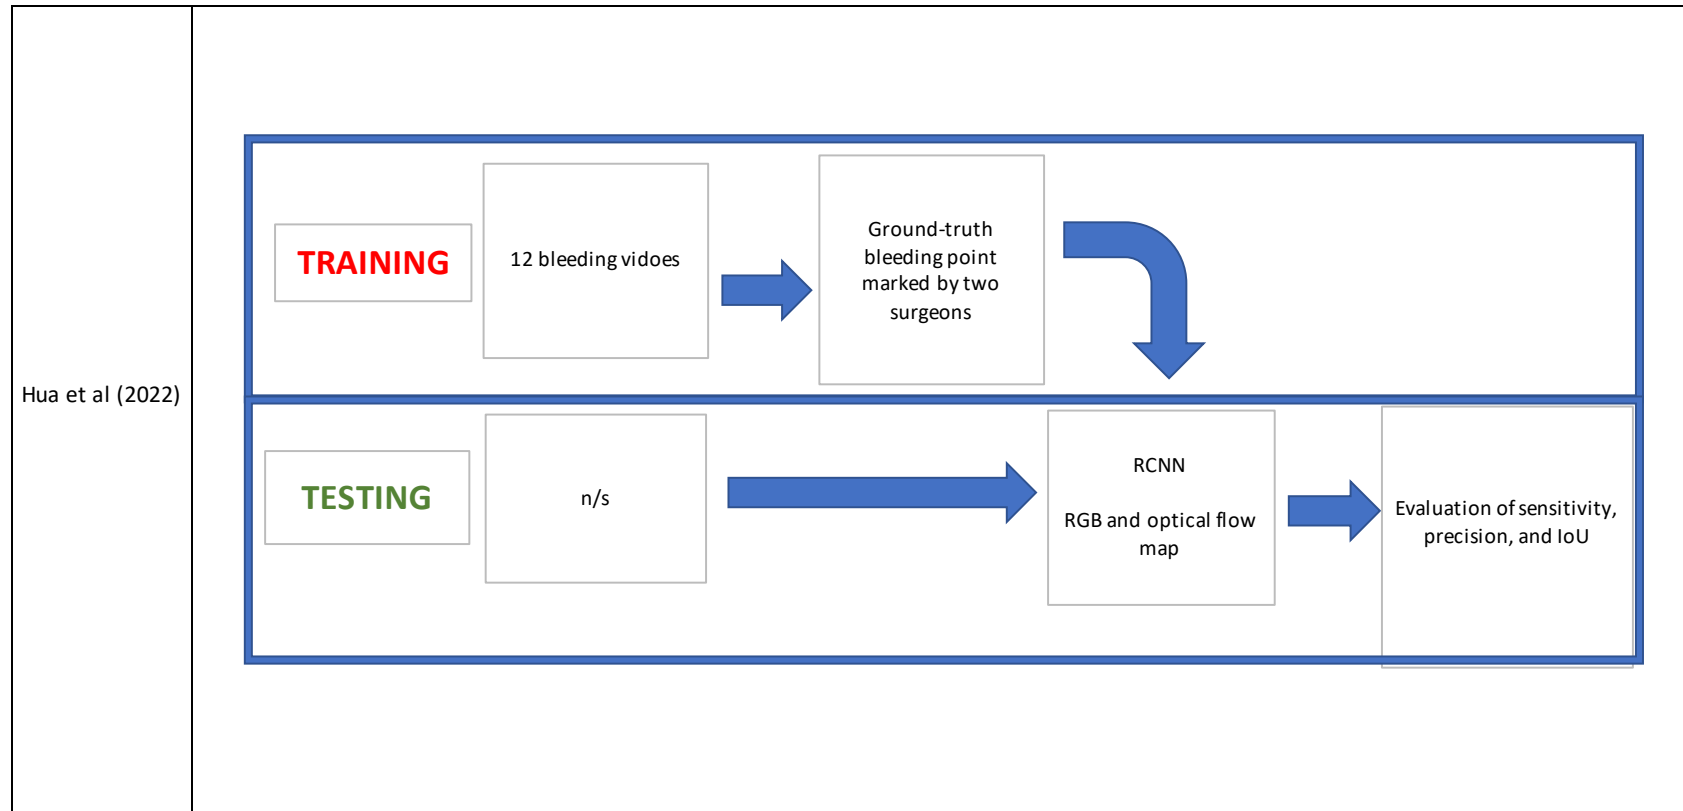

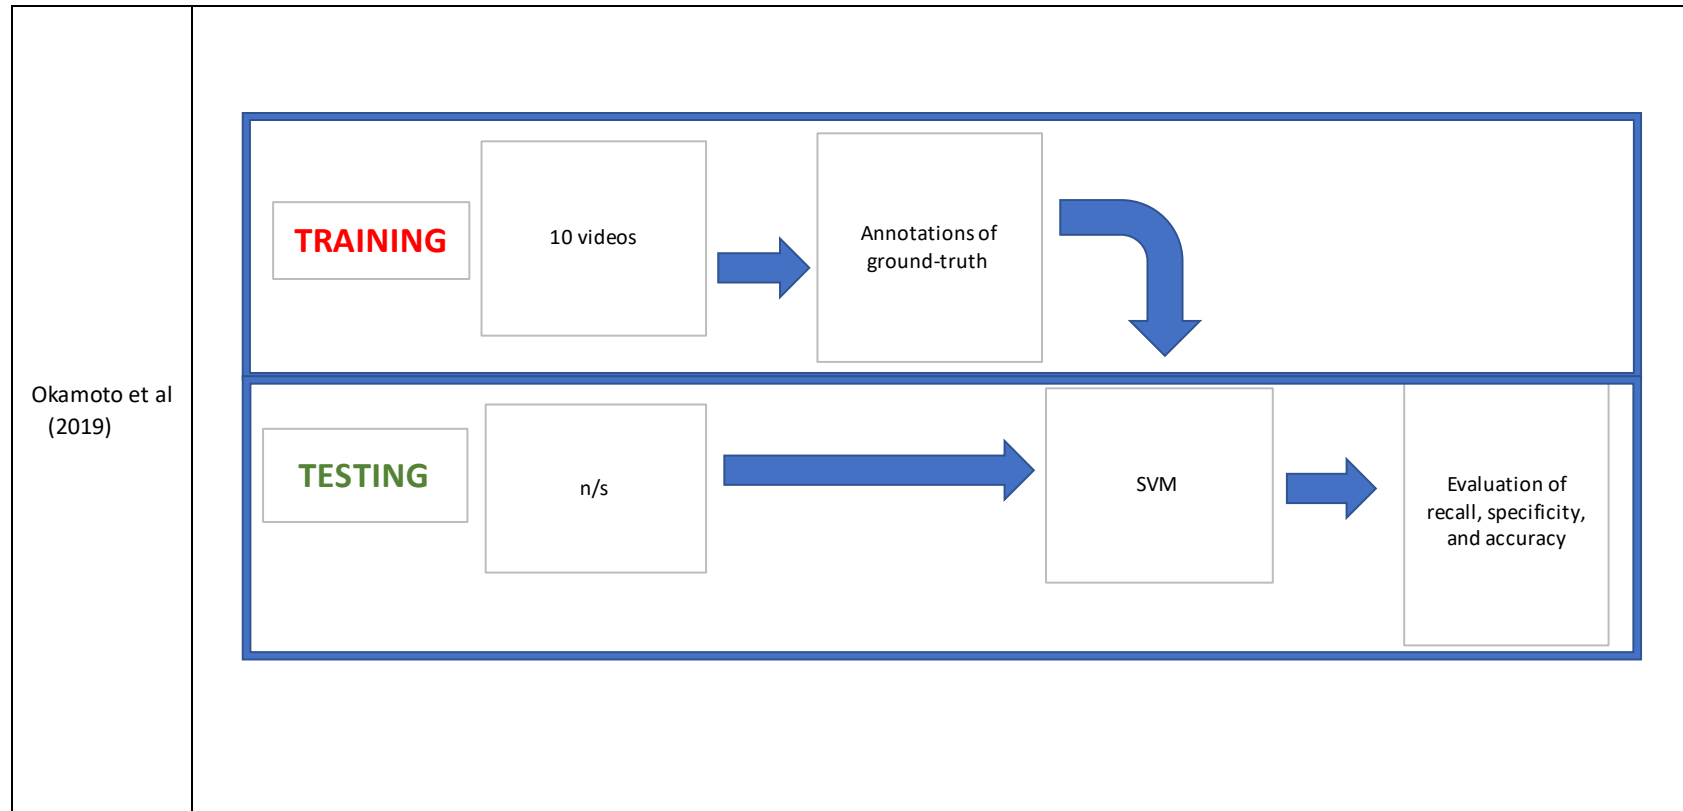

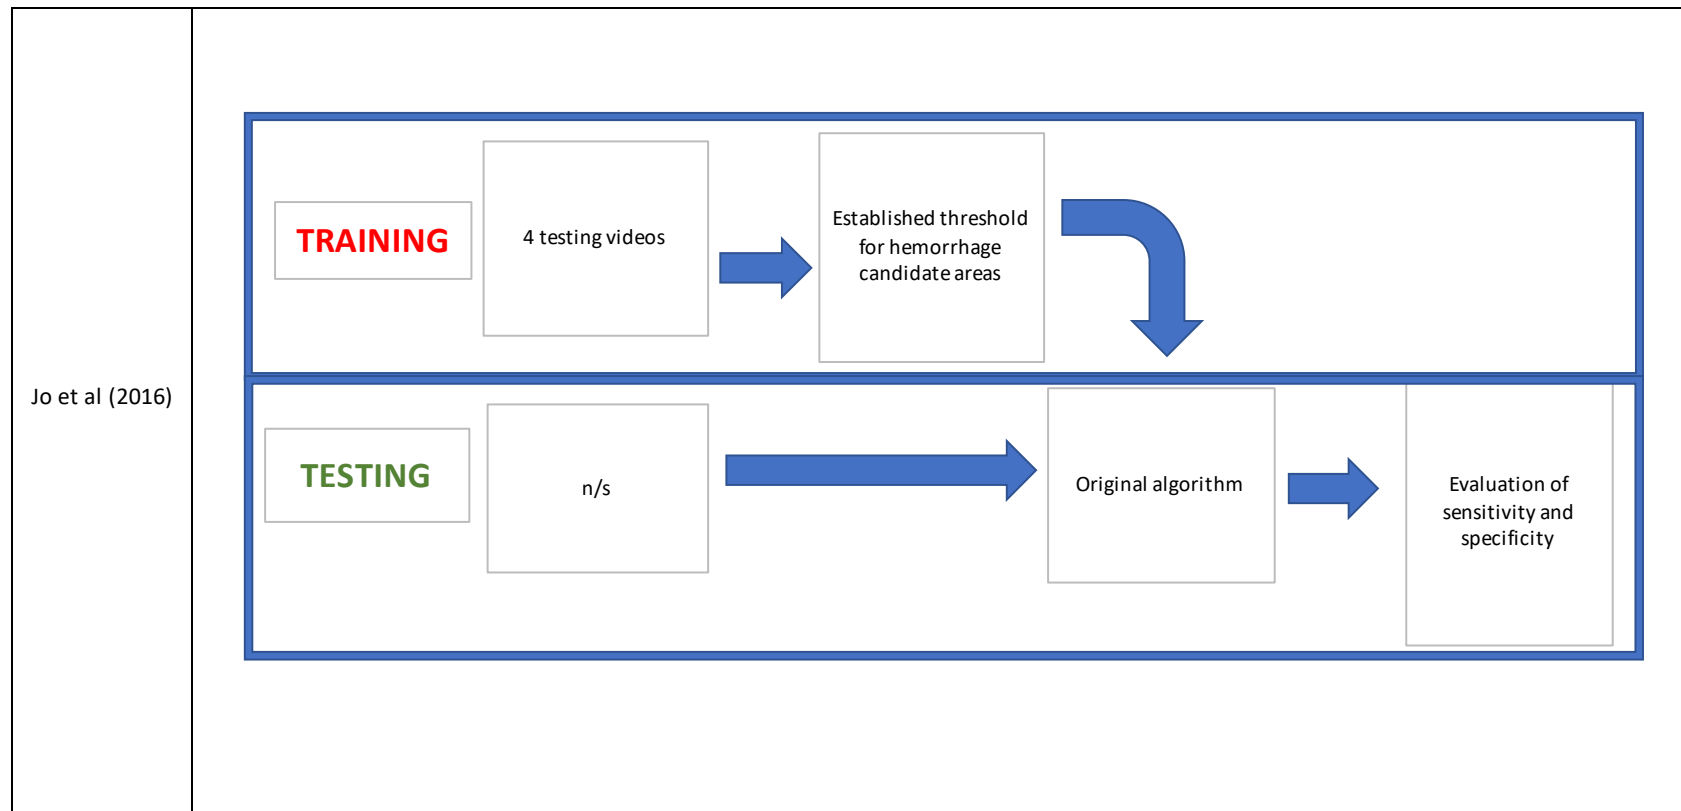

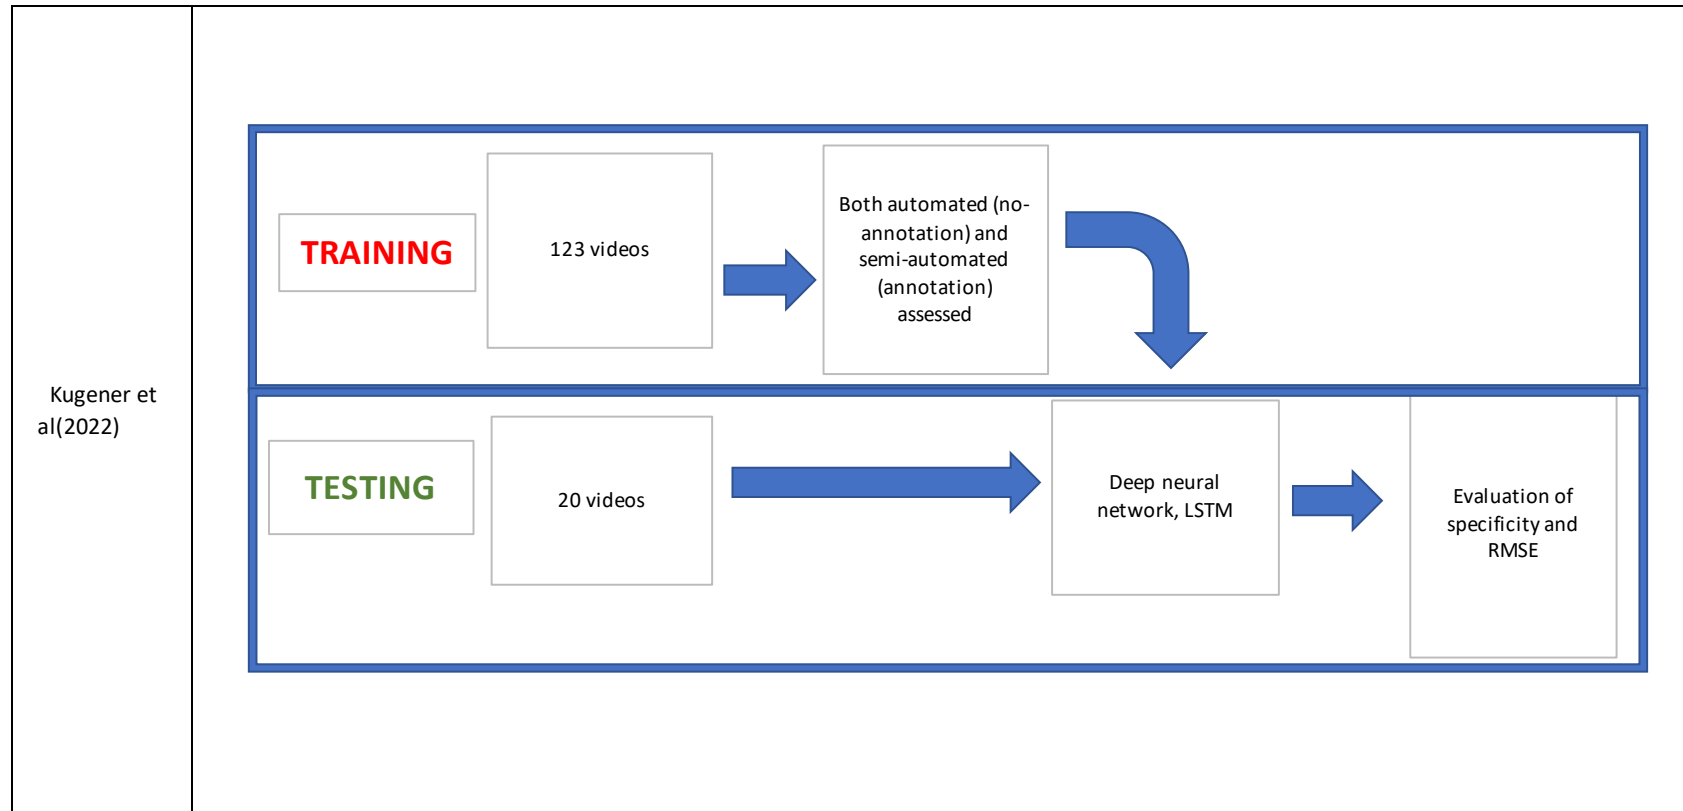

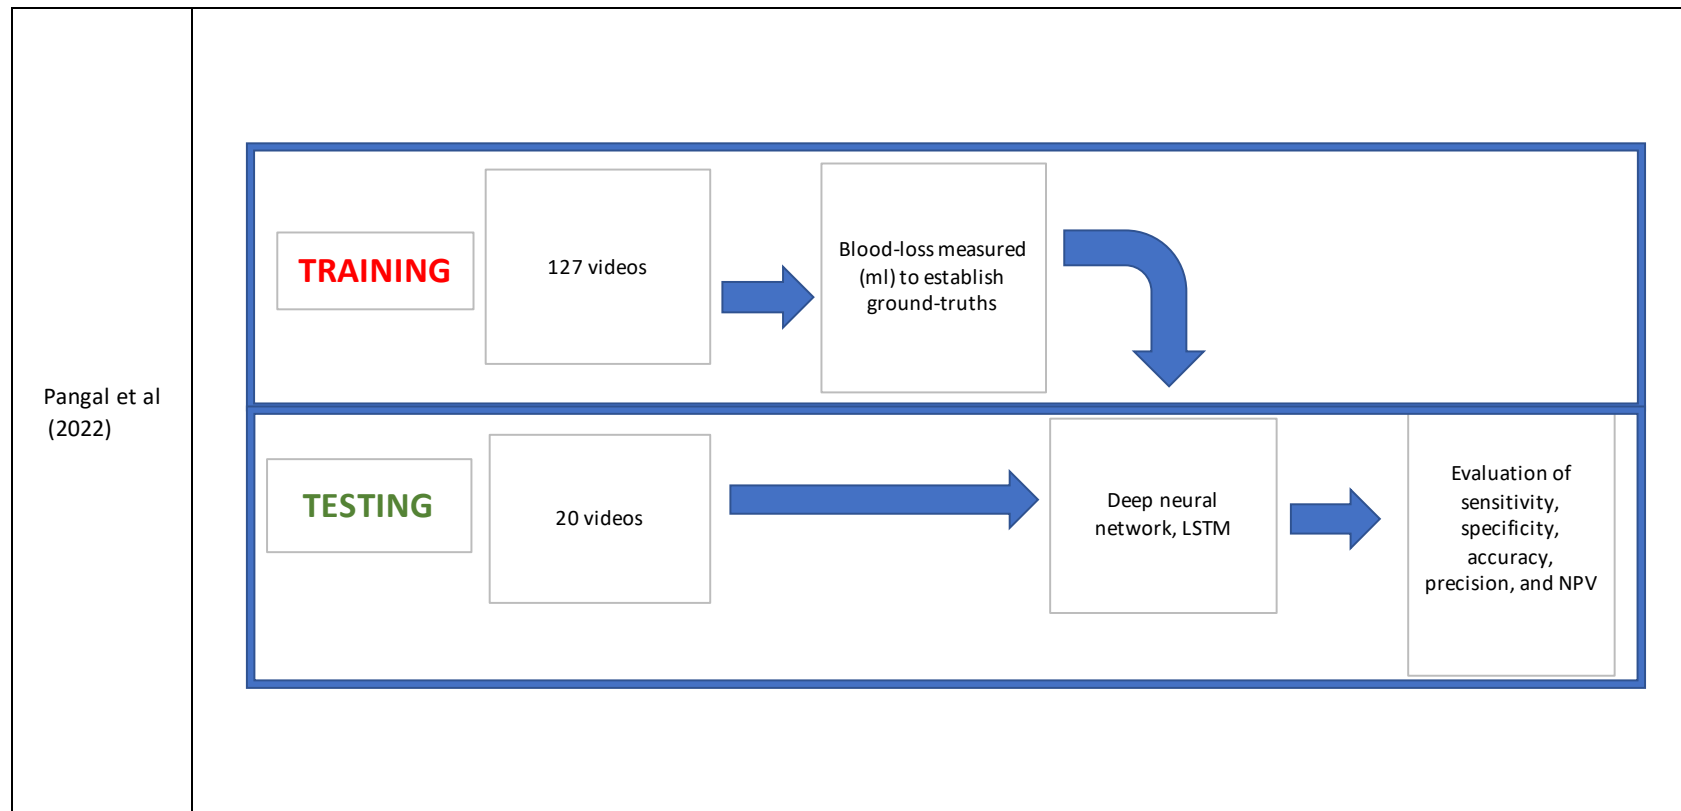

Supplement: s1 [file s1]
